# Supplementary material for: SiO 2 coated perovskite quantum dots and long-afterglow nanocomposites for signal marking and green LEDs
Source: Royal Society of Chemistry journal article supplement (doi:10.1039/d5nj02769a), 2025-01-01
Supplement: d5nj02769a1.pdf [file d5nj02769a1.pdf]

## Supporting information

### 1. Chemicals and Characterization

#### 1.1. Chemicals

Lead Bromide (99%,  $\text{PbBr}_2$ ), Cesium Bromide (99.99%,  $\text{CsBr}$ ), Tetramethyl orthosilicate (99%, TMOS), *n*-hexane (99%), were purchased from Aladdin. Oleic acid (85%, OA) was ordered from Alfa Aesar. Oleylamine (85%, OAm) was ordered from InnoChem. N,N-Dimethylformamide (99%, DMF), Ammonia (25%) were purchased from Macklin. Toluene (99%) was ordered from Titan. Strontium aluminate (99%,  $\text{SrAl}_2\text{O}_4$ ) was ordered from YuMingJie. All chemicals were utilized without further purification.

#### 1.2. Characterization

The morphology and elemental distribution of the as-synthesized samples were examined using a field-emission scanning electron microscope (FE-SEM, Hitachi S-4800, Japan). Powder samples were directly adhered to conductive tape and sputter-coated with a thin gold layer prior to imaging to enhance conductivity. Transmission electron microscopy (TEM), high-resolution TEM (HRTEM), and energy-dispersive X-ray spectroscopy (EDS) mapping were performed on a JEM-2100 microscope (JEOL, Japan). Samples were dispersed in ethanol via ultrasonication for 5 min, and a drop of the suspension was deposited onto a copper grid and dried before observation.

X-ray diffraction (XRD) patterns were recorded on a Rigaku D/Max 2550 diffractometer (Japan) using  $\text{Cu K}\alpha$  radiation ( $\lambda = 1.5406 \text{ \AA}$ ) operated at 30 kV and 20 mA. Data were collected in the  $2\theta$  range of  $10^\circ$ – $70^\circ$  with a step size of  $0.02^\circ$  and a counting time of 1 s per step.

UV-visible absorption spectra were obtained using a Shimadzu UV-2600 spectrophotometer (Japan). Steady-state photoluminescence (PL) spectra were measured on a Shimadzu RF-6000 spectrofluorophotometer (Japan). Time-resolved photoluminescence (TRPL) decay curves were acquired using an FLS1000 fluorescence spectrometer (Edinburgh Instruments, UK).

X-ray photoelectron spectroscopy (XPS) measurements were performed on an EscaLab 250Xi spectrometer (Thermo Fisher Scientific, USA) equipped with a monochromatic Al K $\alpha$  X-ray source ( $h\nu = 1486.6$  eV). The binding energy scale was calibrated against the adventitious C 1s peak at 284.8 eV. Spectral deconvolution was carried out using the XPSPEAK 4.1 software, employing a Shirley-type background and mixed Gaussian-Lorentzian (Voigt) line shapes for peak fitting.

Fourier transform infrared (FTIR) spectra were recorded on a PerkinElmer Frontier spectrometer (USA).

Nitrogen adsorption-desorption isotherms were measured at 77 K using a Micromeritics ASAP 2460 analyzer (USA). Prior to analysis, samples were degassed at 120 °C under vacuum for 6 h. The specific surface area was calculated using the Brunauer-Emmett-Teller (BET) method.

A spin coater (KW-4A, Beijing Cedes Electronics Co., Ltd., China) was used for the preparation of thin films in certain device fabrication steps.

## 2. Supporting Figures

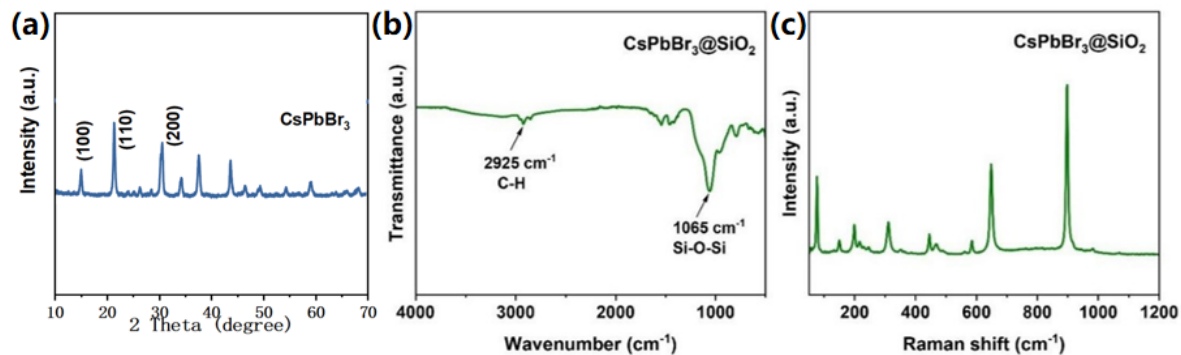

**Figure S1.** (a) XRD pattern of the pristine CsPbBr<sub>3</sub>. (b) FTIR spectra of CsPbBr<sub>3</sub>@SiO<sub>2</sub>. (c) Raman spectrum of CsPbBr<sub>3</sub>@SiO<sub>2</sub>.

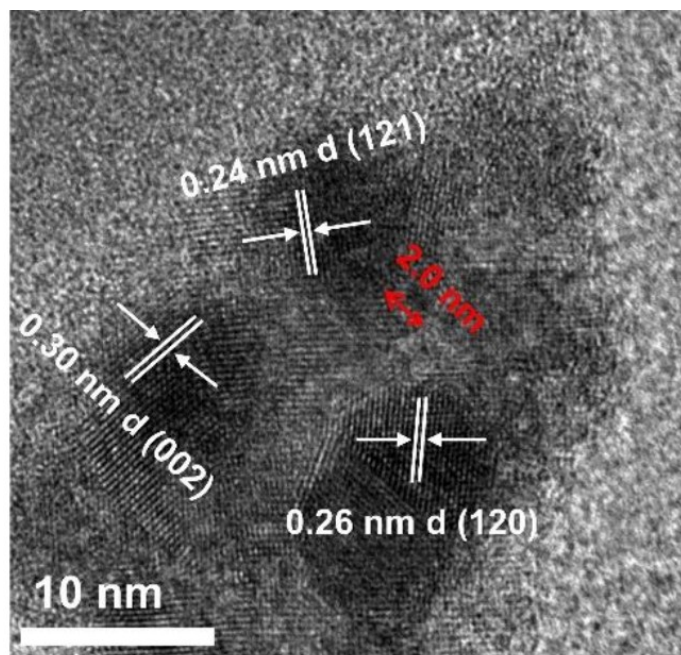

**Figure S2.** HRTEM image of CsPbBr<sub>3</sub>@SiO<sub>2</sub>.

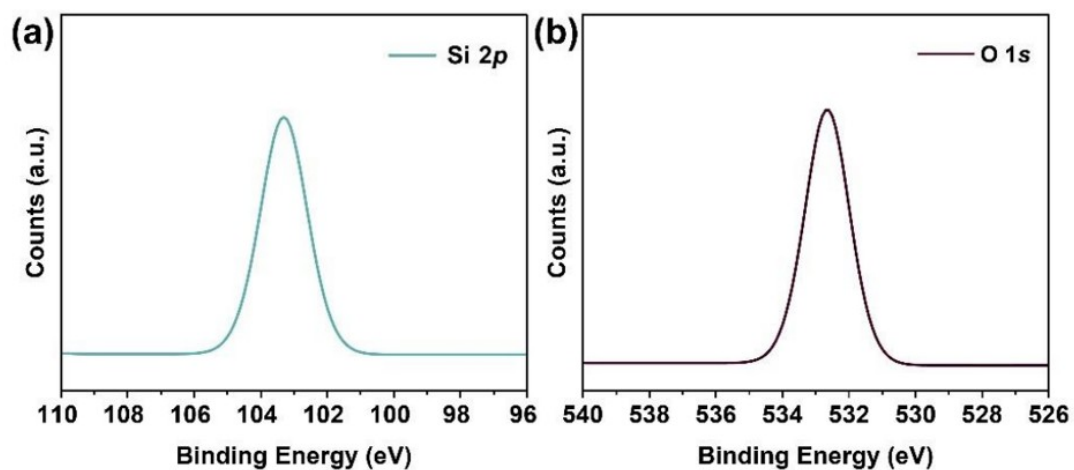

**Figure S3.**  $\text{Si } 2p$  (a) and  $\text{O } 1s$  (b) XPS spectra of  $\text{CsPbBr}_3@\text{SiO}_2$ .

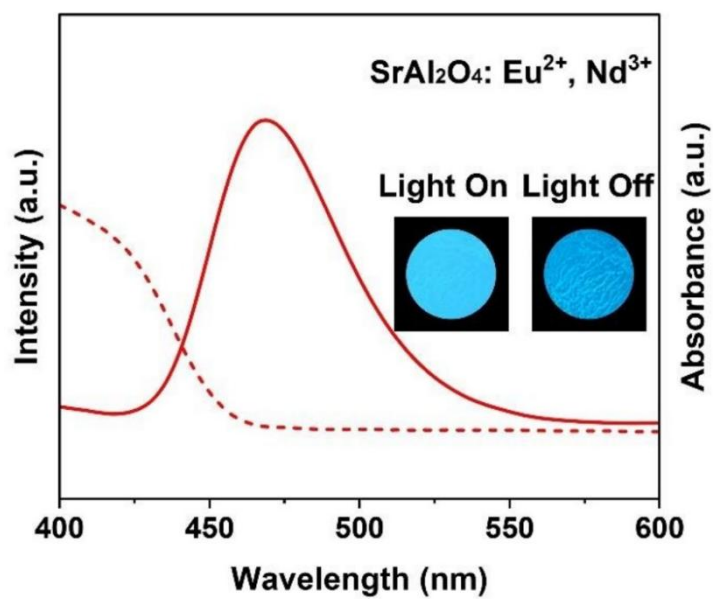

**Figure S4.** PL spectra and UV-visible absorption spectrum of SAO at 365 nm excitation (insets are fluorescent and afterglow photographs of SAO).

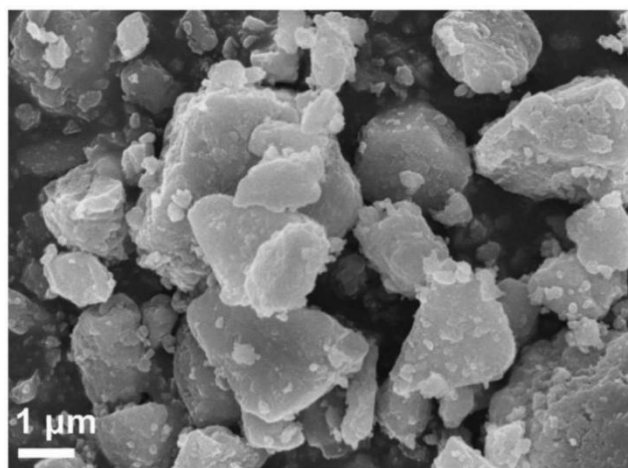

**Figure S5.** SEM image of SAO.

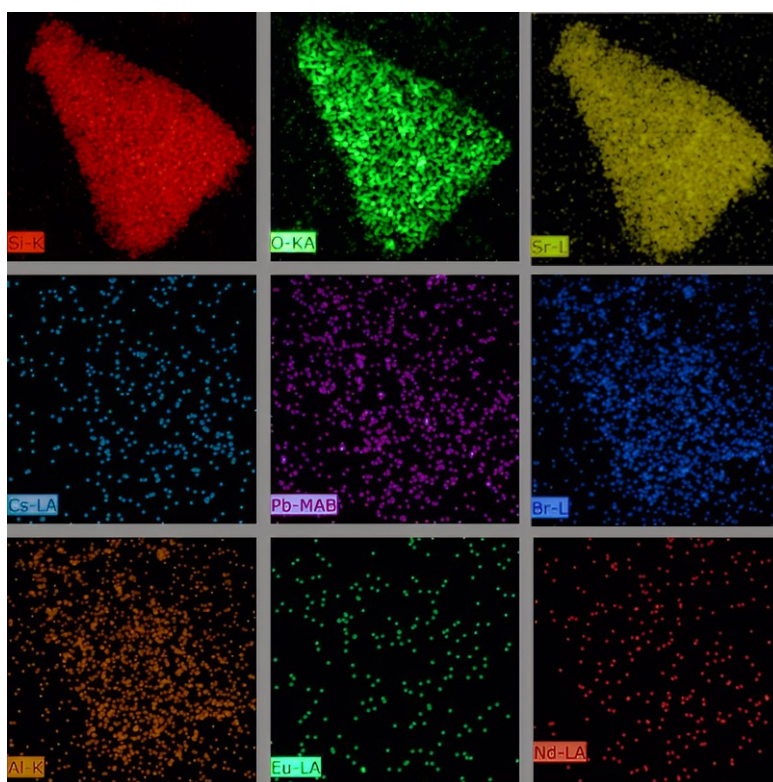

**Figure S6.** EDX mappings of 0.1SAO@CsPbBr<sub>3</sub>@SiO<sub>2</sub>.

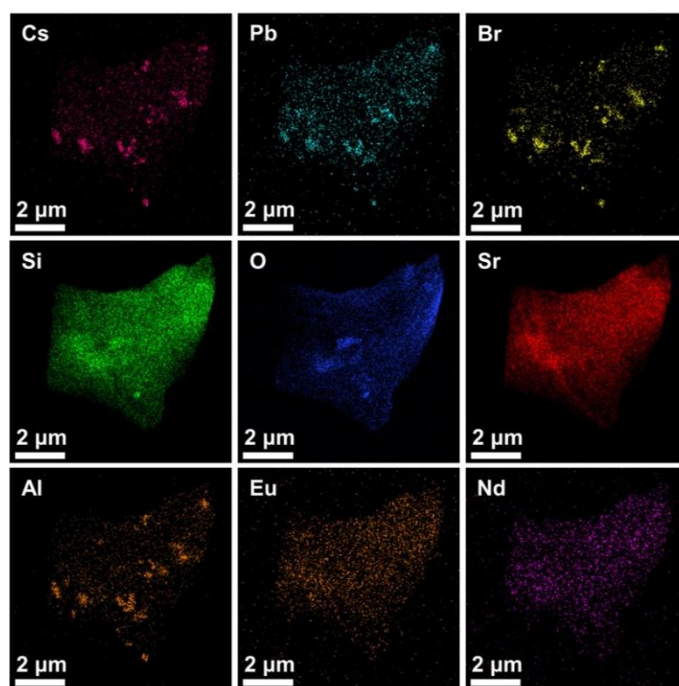

**Figure S7.** The corresponding elemental mapping of Cs, Pb, Br, Si, O, Sr, Al, Eu, Nd of 0.1SAO@CsPbBr<sub>3</sub>@SiO<sub>2</sub>.

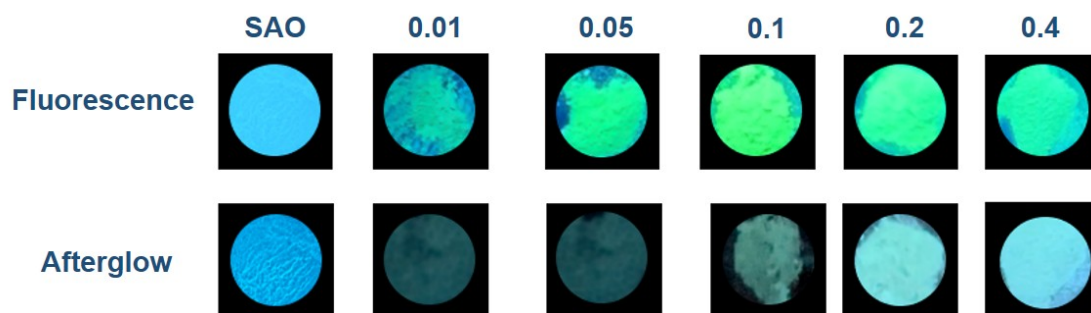

**Figure S8.** Fluorescence and afterglow photographs of different contents of SAO@CsPbBr<sub>3</sub>@SiO<sub>2</sub> and SAO.

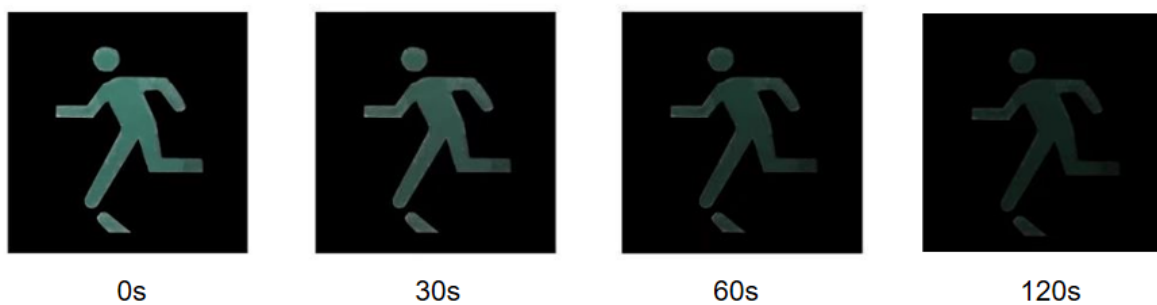

**Figure S9.** Time-sequence images of the "Emergency Exit" sign after UV light cessation (at 0, 30, 60, and 120 s).

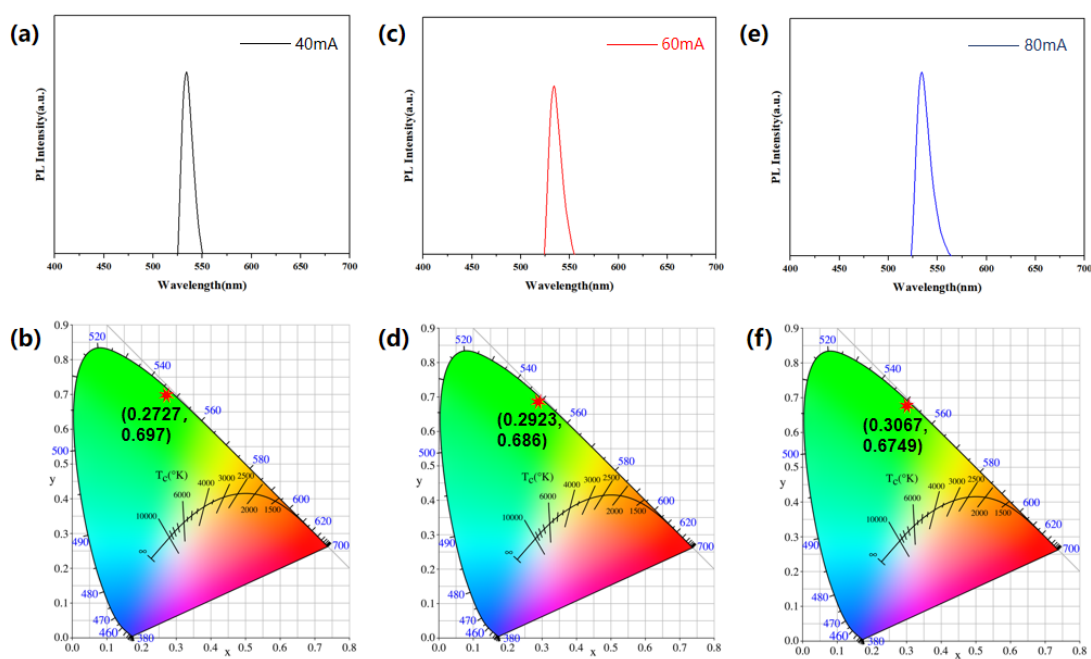

**Figure S10.** EL spectra and CIE coordinates of the LED at operating currents of 40 mA (a, b), 60 mA (c, d), and 80 mA (e, f).
